# Supplementary material for: Bioinformatic features and immunological response of recombinant antigen CTLA4-IgV-EgG1Y162 against Echinococcus granulosus
Source: PubMed Central journal article supplement (PMC11653501; doi:10.1590/1414-431x2024e13139), 2024-11-25
Supplement: 1414-431X-bjmbr-57-e13139-suppl.pdf [file 1414-431X-bjmbr-57-e13139-suppl.pdf]

**Figure S1.** EgG1Y162 protein. The red flag indicates a high prediction score.

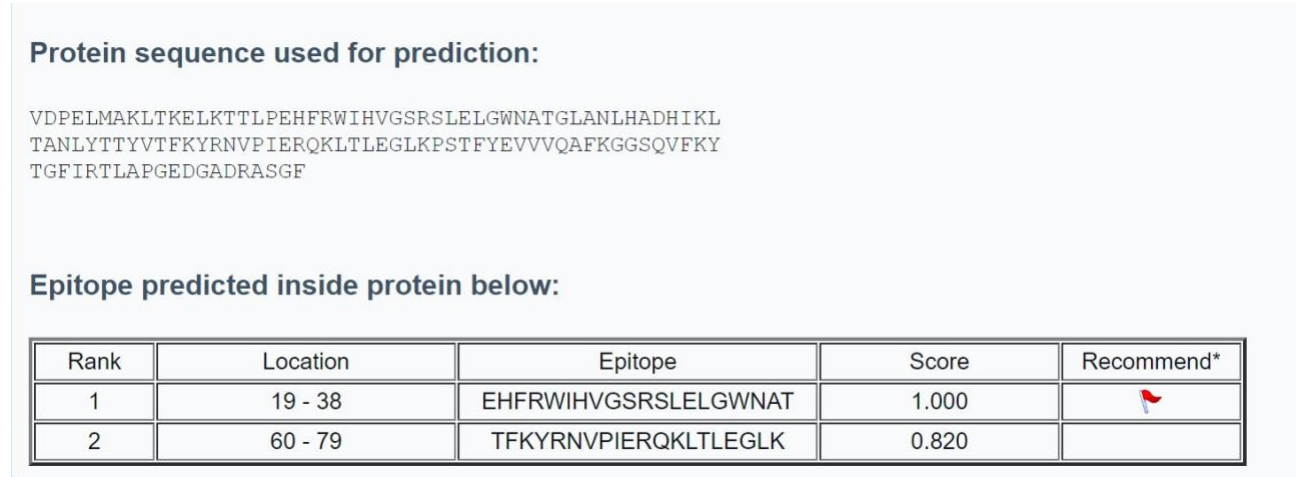

**Figure S2.** CTLA-4IgV–EgG1Y162 protein. The red flag indicates a high prediction score.

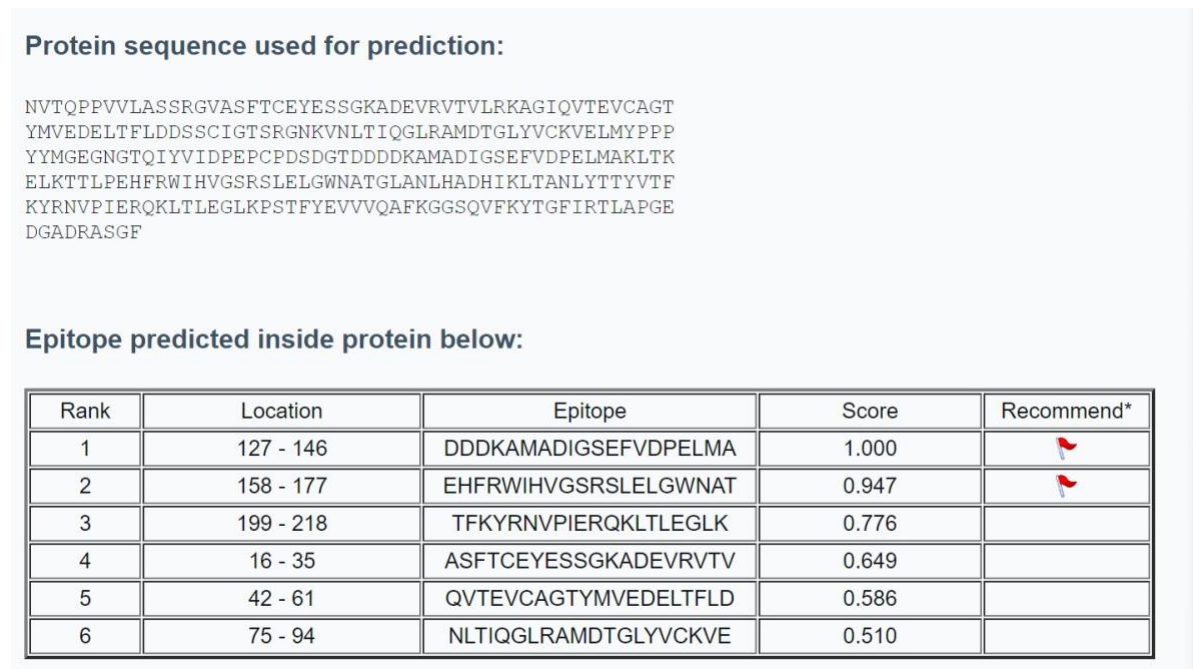

**Table S1.** T/B cell antigen epitope prediction of recombinant proteins.

| Recombinant proteins | Position               |                        | T/B combined epitope                                                                                 |
|----------------------|------------------------|------------------------|------------------------------------------------------------------------------------------------------|
|                      | B-cell antigen epitope | T-cell antigen epitope |                                                                                                      |
| EgG1Y162             | 19–28                  | 7–18                   | <b><i>AKLTKELKTTLP</i></b> <span style="border: 1px solid black;">EHFRWIHVGS</span>                  |
|                      | 60–75                  | 47–71                  | <b><i>HIKLTANLYTTYV</i></b> <span style="border: 1px solid black;">TFKYRNVPIERQKLT</span>            |
|                      | 108–117                | 95–118                 | <b><i>SQVFKYTGFI</i></b> <span style="border: 1px solid black;">RDLAPGEDGADRA</span> <b><i>S</i></b> |
| CTLA-4IgV–EgG1Y162   | 158–167                | 146–160                | <b><i>AKLTKELKTTLP</i></b> <span style="border: 1px solid black;">EHFRWIHVGS</span>                  |
|                      | 199–209                | 184–208                | <b><i>ADHIKLTANLYTTYV</i></b> <span style="border: 1px solid black;">TFKYRNVPIER</span>              |
|                      | 247–256                | 234–250                | <b><i>SQVFKYTGFI</i></b> <span style="border: 1px solid black;">RDLAPGEDGADRA</span>                 |

Bold italic type indicates the T epitope and the B epitope is in the box.

**Table S2.** Analysis of the maturation of dendritic cells (DCs) in the spleen of mice in each group.

| Groups             | Maturation of DC (%) |
|--------------------|----------------------|
| Control            | 11.720 ± 1.539       |
| Negative           | 9.436 ± 1.472        |
| CTLA-4IgV–EgG1Y162 | 16.360 ± 2.414*#     |
| EgG1Y162           | 11.010 ± 2.299       |

Data are reported as means and SD (n=6). \*P<0.05 compared to control group and negative group; #P<0.05 compared to EgG1Y162 group (ANOVA).

**Table S3.** CCK8 results of the proliferation of splenic lymphocytes in each group.

| Groups             | OD value        |
|--------------------|-----------------|
| Control            | 0.333 ± 0.024   |
| Negative           | 0.331 ± 0.021   |
| CTLA-4IgV–EgG1Y162 | 0.456 ± 0.012*# |
| EgG1Y162           | 0.390 ± 0.023*  |

Data are reported as means and SD (n=6). \*P<0.05 compared to control group and negative group; #P<0.05 compared to EgG1Y162 group (ANOVA).

**Table S4.** Expression levels of cytokines interleukin (IL)-4 and interferon (IFN)- $\gamma$  in peripheral blood of mice detected by ELISA.

| Groups             | IL-4 (pg/mL)     | IFN- $\gamma$ (pg/mL) |
|--------------------|------------------|-----------------------|
| Control            | 6.801 ± 1.726    | 14.794 ± 4.777        |
| Negative           | 7.154 ± 3.483    | 16.520 ± 4.451        |
| CTLA-4IgV–EgG1Y162 | 15.669 ± 3.346*# | 31.768 ± 4.409*#      |
| EgG1Y162           | 11.611 ± 1.432*  | 24.662 ± 3.117*       |

Data are reported as means and SD (n=6). \*P<0.05 compared to control group and negative group; #P<0.05 compared to EgG1Y162 group (ANOVA).
